# Supplementary material
Source: ML conference proceedings conference paper supplement (https://openaccess.thecvf.com/content/CVPR2023/html/Park_Perception-Oriented_Single_Image_CVPR_2023_paper.html)
Supplement: Supplementary file 1 [file Park_Perception-Oriented_Single_Image_CVPR_2023_supplemental.pdf]

# Perception-Oriented Single Image Super-Resolution using Optimal Objective Estimation - Supplementary Material

Seung Ho Park<sup>1,2</sup>, Young Su Moon<sup>2</sup>, Nam Ik Cho<sup>1,3</sup>

<sup>1</sup>Department of Electrical and Computer Engineering, INMC, Seoul National University, Korea

<sup>2</sup>Visual Display Division, Samsung Electronics, Korea

<sup>3</sup>IPAI, Seoul National University, Korea

## 1. More Visual Comparisons of SISR 4×

We provide more visual comparisons of 4× SISR between our proposed SROOE and other state-of-the-art methods including a distortion-oriented method, RRDB [7], and perception-oriented methods, such as SRGAN [2], ESRGAN [7], SFTGAN [6], RankSRGAN [8], SRFlow [3], SPSR [4], in Fig. from 1 to 6. Among the seven perception-oriented SR methods, the best performances are highlighted in red.

## 2. Performance Comparison of SISR 8×

**Quantitative Comparison.** Table 1 shows the quantitative performance comparison for 8× SISR. We compared it with a distortion-oriented method, RRDB [7], and perception-oriented methods, such as ESRGAN [7], SRFlow [3], and FxSR [5]. The table shows that our method yields the best results among the perception-oriented methods on all datasets, in terms of PSNR, SSIM, LPIPS and DISTS [1]. However, in LR-PSNR, unlike SR 4×, less than 45 dB indicates that LR consistency needs improvement.

**Qualitative Comparison.** Fig. 7 and Fig. 8 show visual comparisons, where we can observe that SROOE generates more accurate and cleaner structures with less unnatural details. Among the four perception-oriented SR methods, the best performances are highlighted in red.

## 3. Performance comparison of SR results of ESRGAN models with different weight vectors for perceptual loss

Table 2 shows the data before normalization. Min-max normalization used for Table 1 in the main paper used is as follows:

$$x' = (x - \min(x)) / (\max(x) - \min(x)). \quad (1)$$

## References

- [1] Keyan Ding, Kede Ma, Shiqi Wang, and Eero P. Simoncelli. Image quality assessment: Unifying structure and texture similarity. *IEEE Transactions on Pattern Analysis and Machine Intelligence*, pages 1–1, 2020. 1
- [2] Christian Ledig, Lucas Theis, Ferenc Huszár, Jose Caballero, Andrew Cunningham, Alejandro Acosta, Andrew Aitken, Alykhan Tejani, Johannes Totz, Zehan Wang, et al. Photo-realistic single image super-resolution using a generative adversarial network. In *Proceedings of the IEEE conference on computer vision and pattern recognition*, pages 4681–4690, 2017. 1
- [3] Andreas Lugmayr, Martin Danelljan, Luc Van Gool, and Radu Timofte. SrfLOW: Learning the super-resolution space with normalizing flow. In *European Conference on Computer Vision*, pages 715–732. Springer, 2020. 1, 8
- [4] Cheng Ma, Yongming Rao, Yean Cheng, Ce Chen, Jiwen Lu, and Jie Zhou. Structure-preserving super resolution with gradient guidance. In *Proceedings of the IEEE/CVF Conference on Computer Vision and Pattern Recognition*, pages 7769–7778, 2020. 1
- [5] Seung Ho Park, Young Su Moon, and Nam Ik Cho. Flexible style image super-resolution using conditional objective. *IEEE Access*, 10:9774–9792, 2022. 1, 8
- [6] Xintao Wang, Ke Yu, Chao Dong, and Chen Change Loy. Recovering realistic texture in image super-resolution by deep spatial feature transform. In *Proceedings of the IEEE conference on computer vision and pattern recognition*, pages 606–615, 2018. 1
- [7] Xintao Wang, Ke Yu, Shixiang Wu, Jinjin Gu, Yihao Liu, Chao Dong, Yu Qiao, and Chen Change Loy. ESRGAN: Enhanced super-resolution generative adversarial networks. In *Proceedings of the European Conference on Computer Vision (ECCV)*, pages 0–0, 2018. 1, 8
- [8] Wenlong Zhang, Yihao Liu, Chao Dong, and Yu Qiao. RankSRGAN: Generative adversarial networks with ranker for image super-resolution. In *2019 IEEE/CVF International Conference on Computer Vision (ICCV)*, pages 3096–3105, 2019. 1

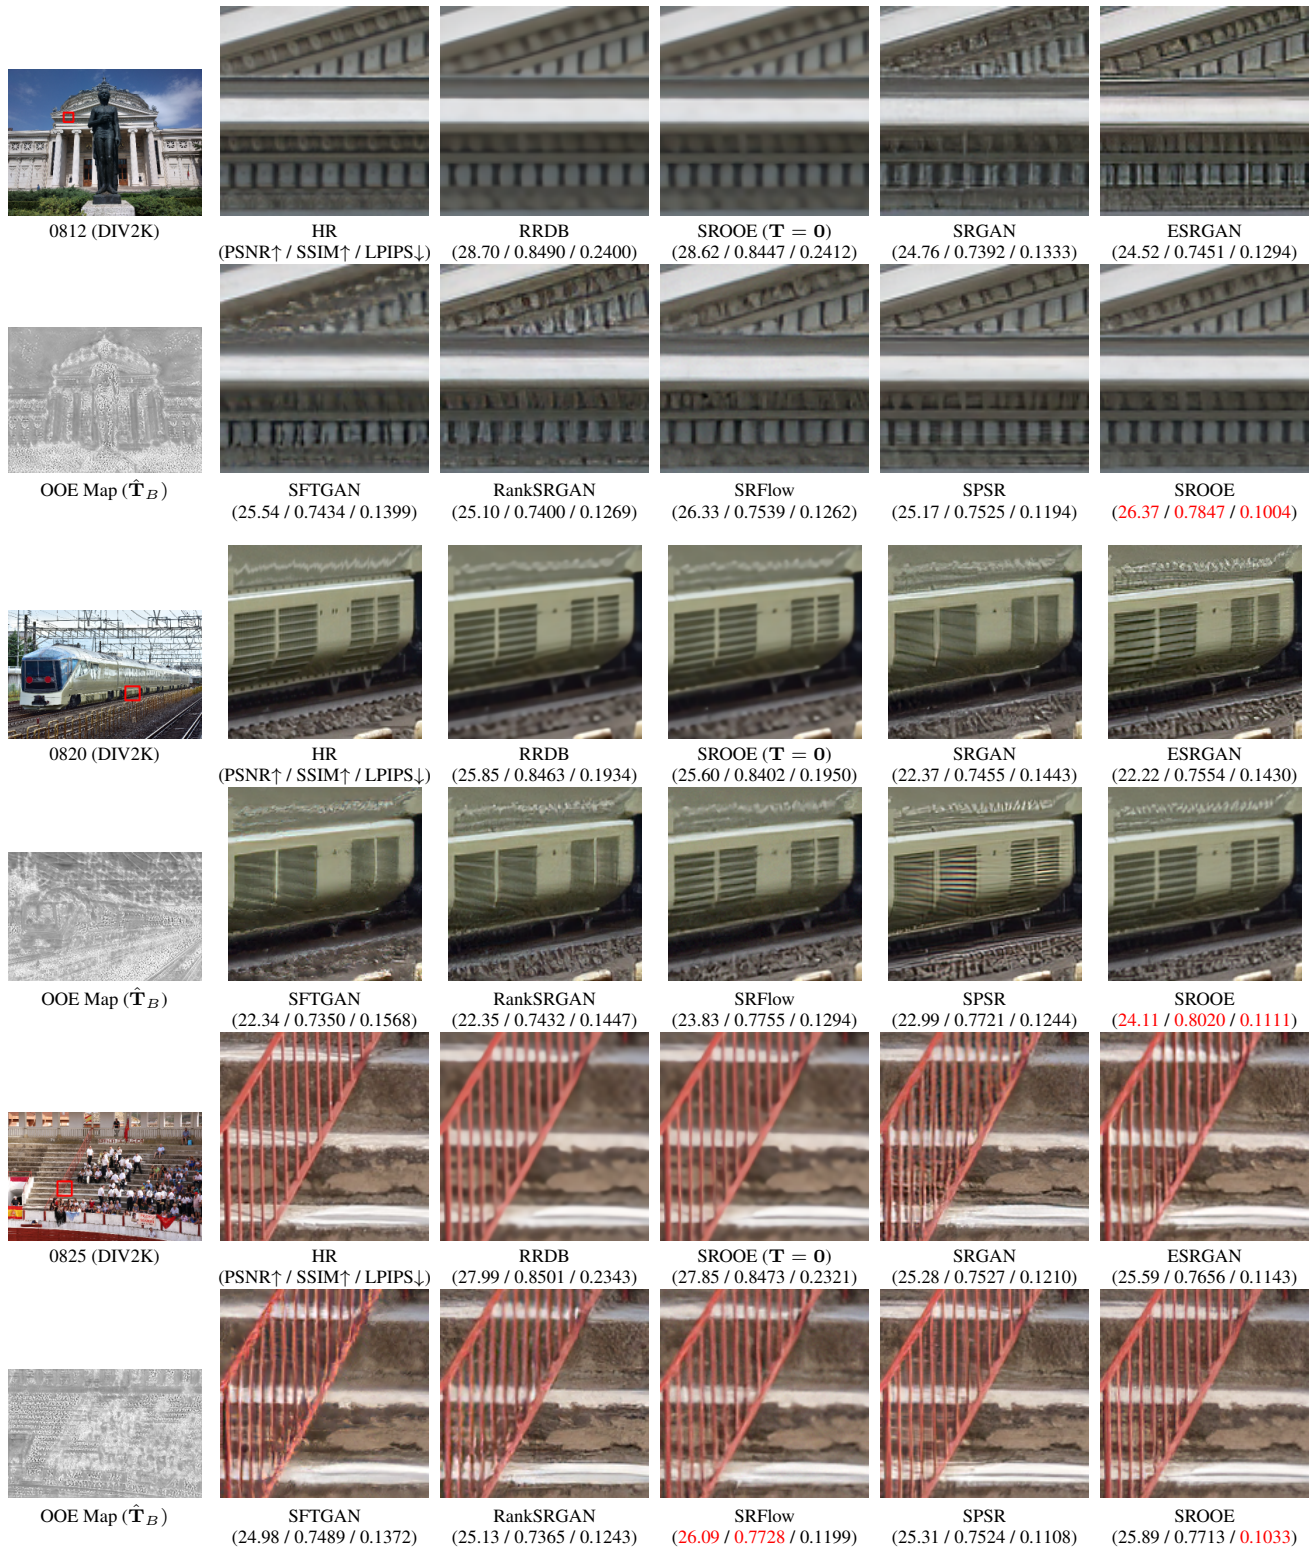

Figure 1. Visual comparison with state-of-the-art methods for  $4\times$  SR results. Among the seven perception-oriented SR methods, the best performances are highlighted in red.



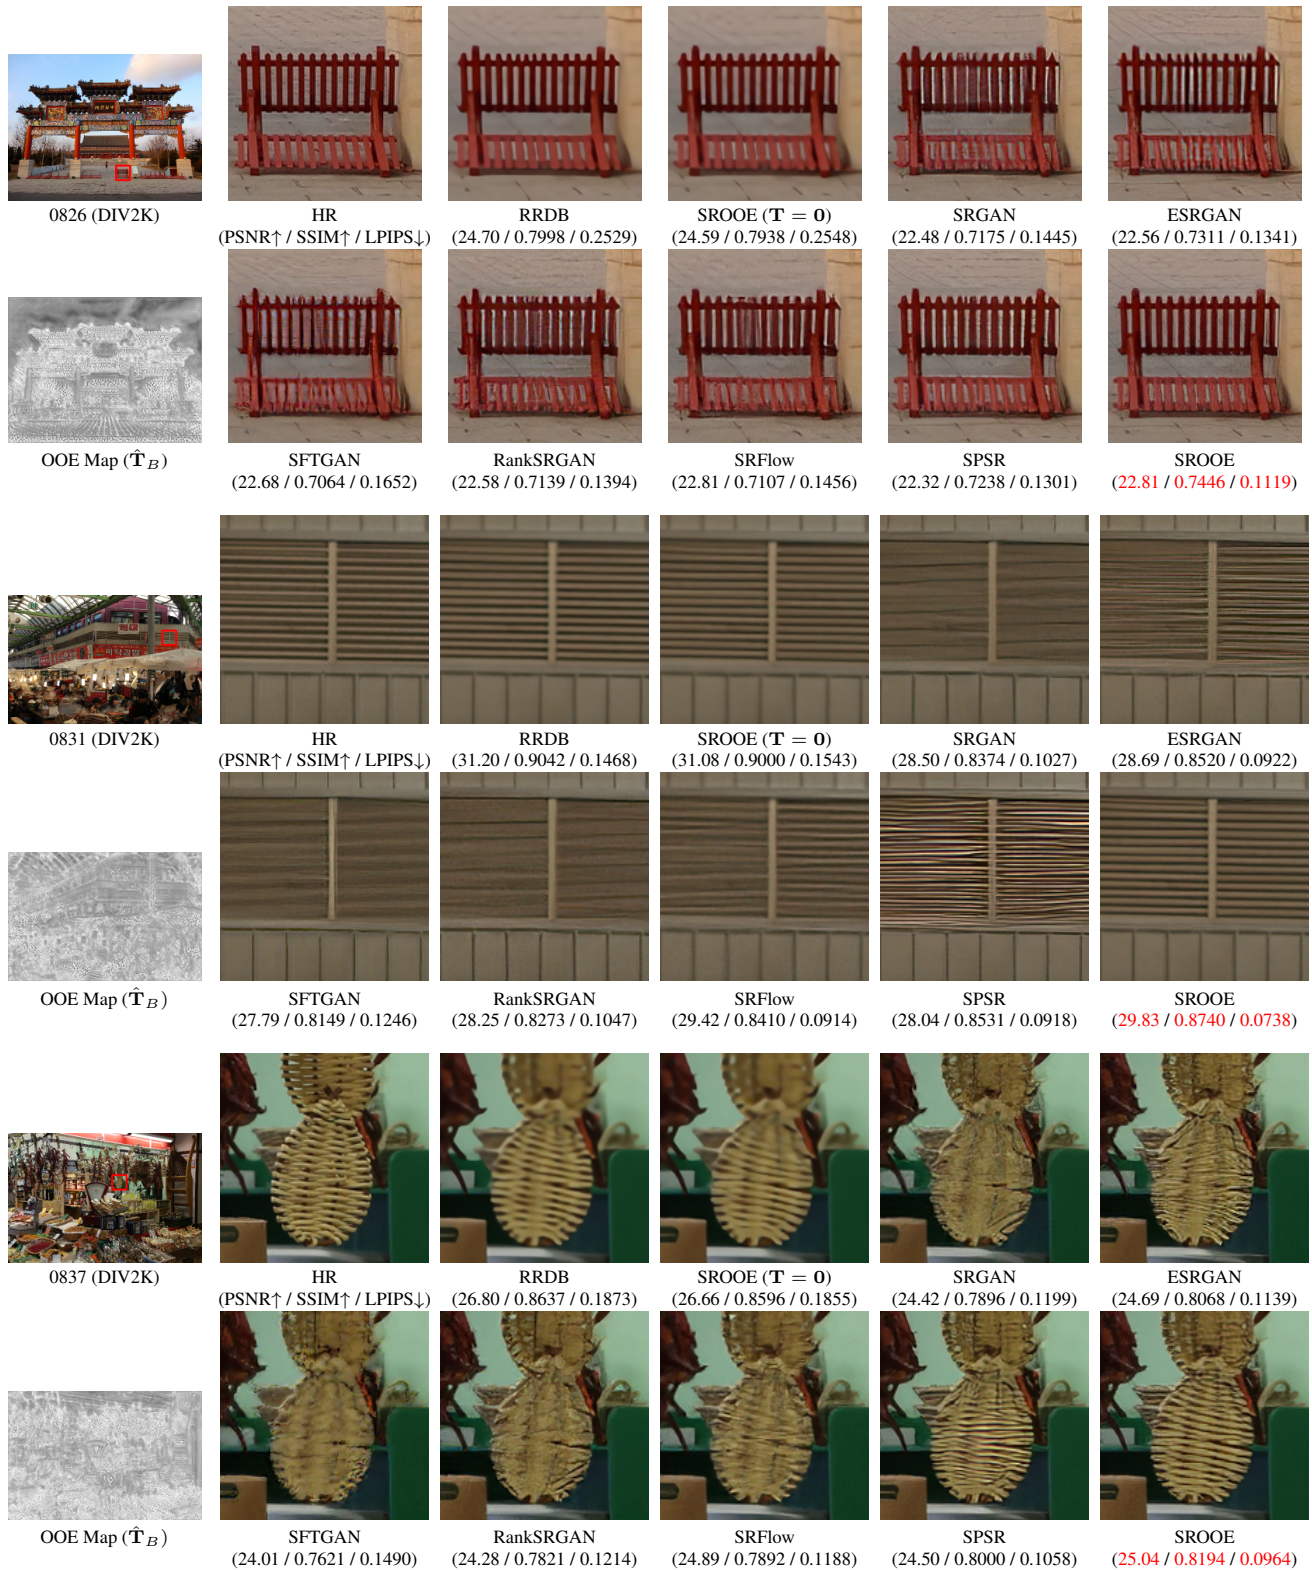

Figure 2. Visual comparison with state-of-the-art methods for  $4\times$  SR results. Among the seven perception-oriented SR methods, the best performances are highlighted in red.



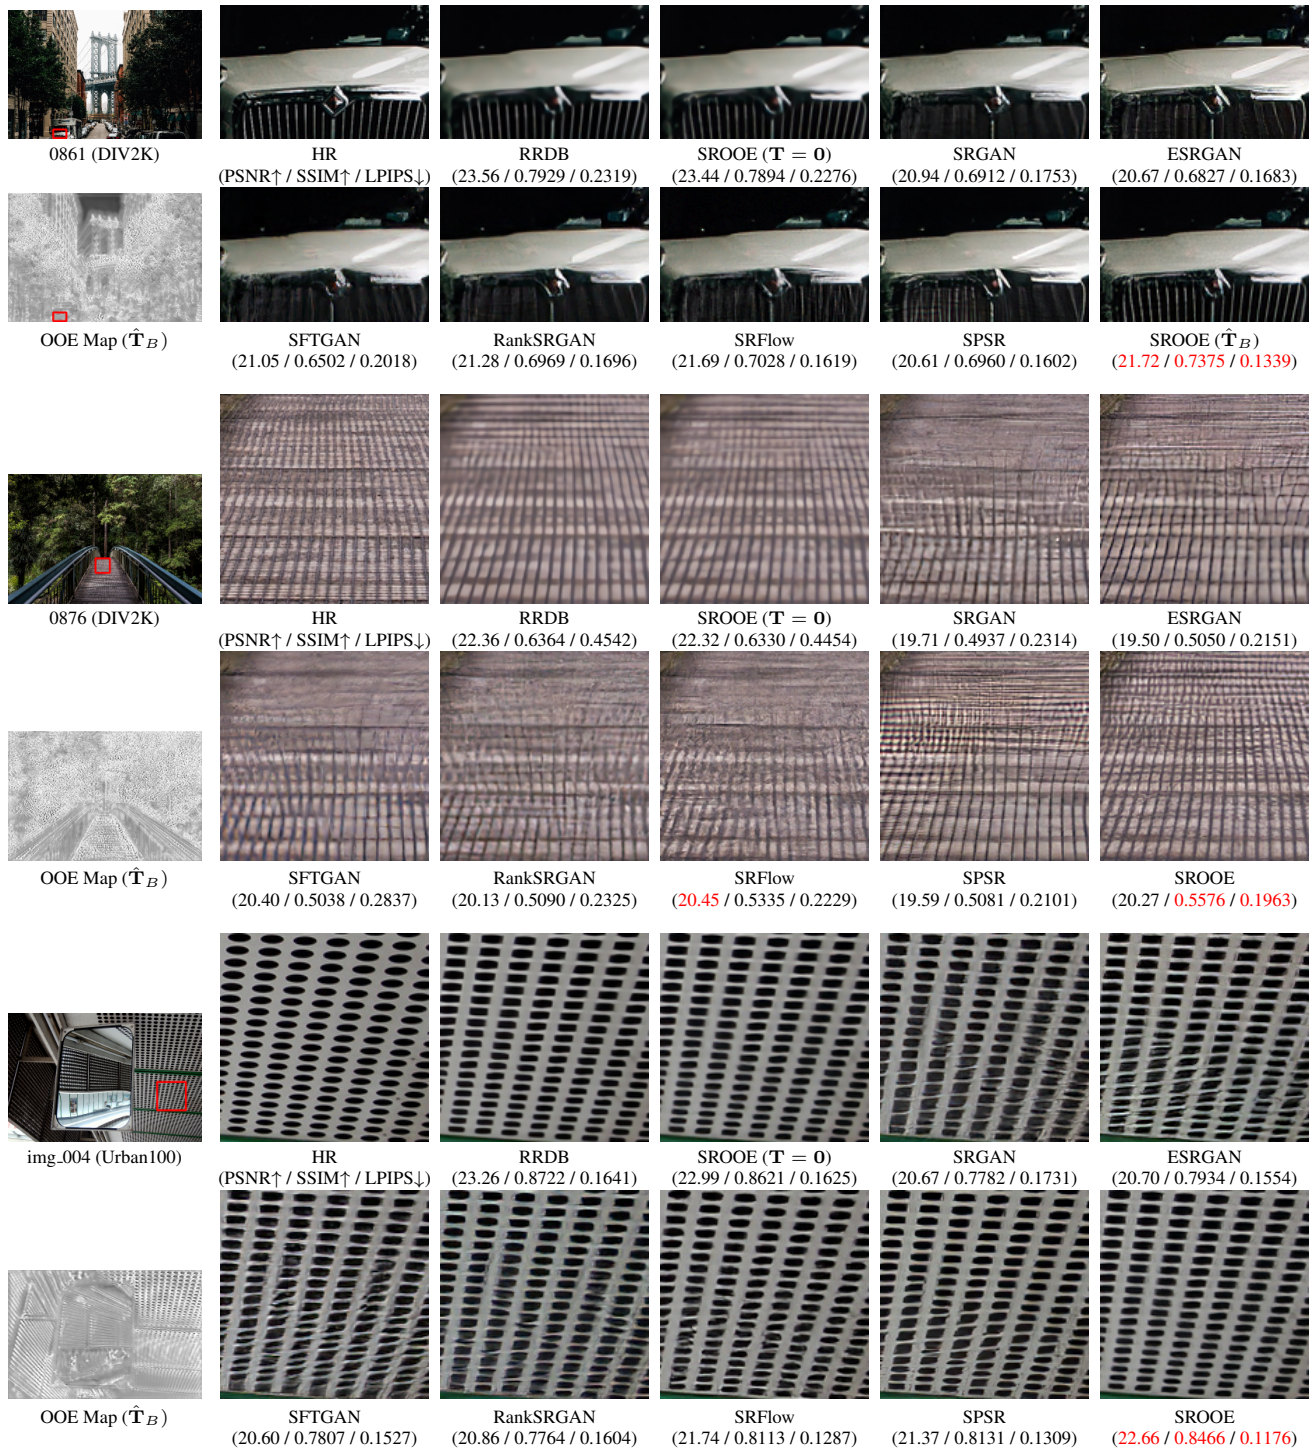

Figure 3. Visual comparison with state-of-the-art methods for  $4\times$  SR results. Among the seven perception-oriented SR methods, the best performances are highlighted in red.



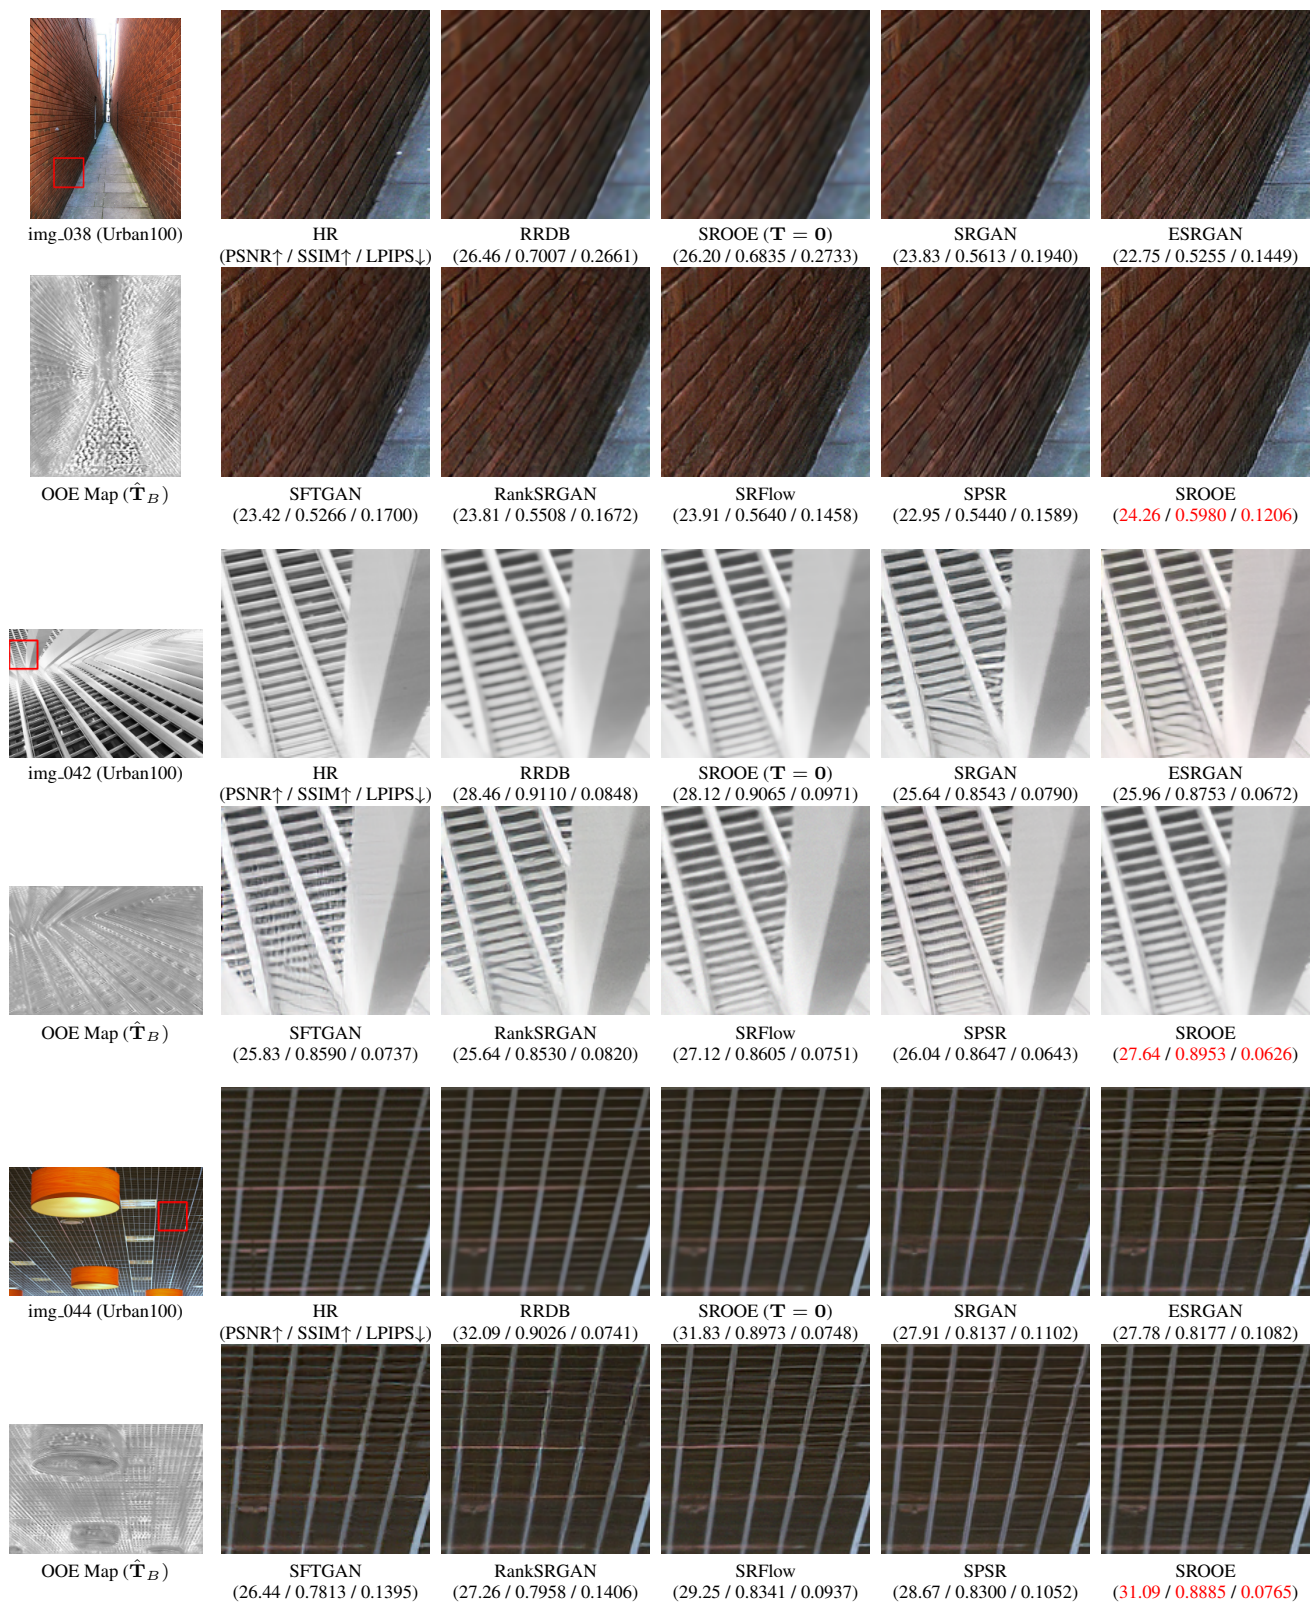

Figure 4. Visual comparison with state-of-the-art methods for 4 $\times$  SR results. Among the seven perception-oriented SR methods, the best performances are highlighted in red.



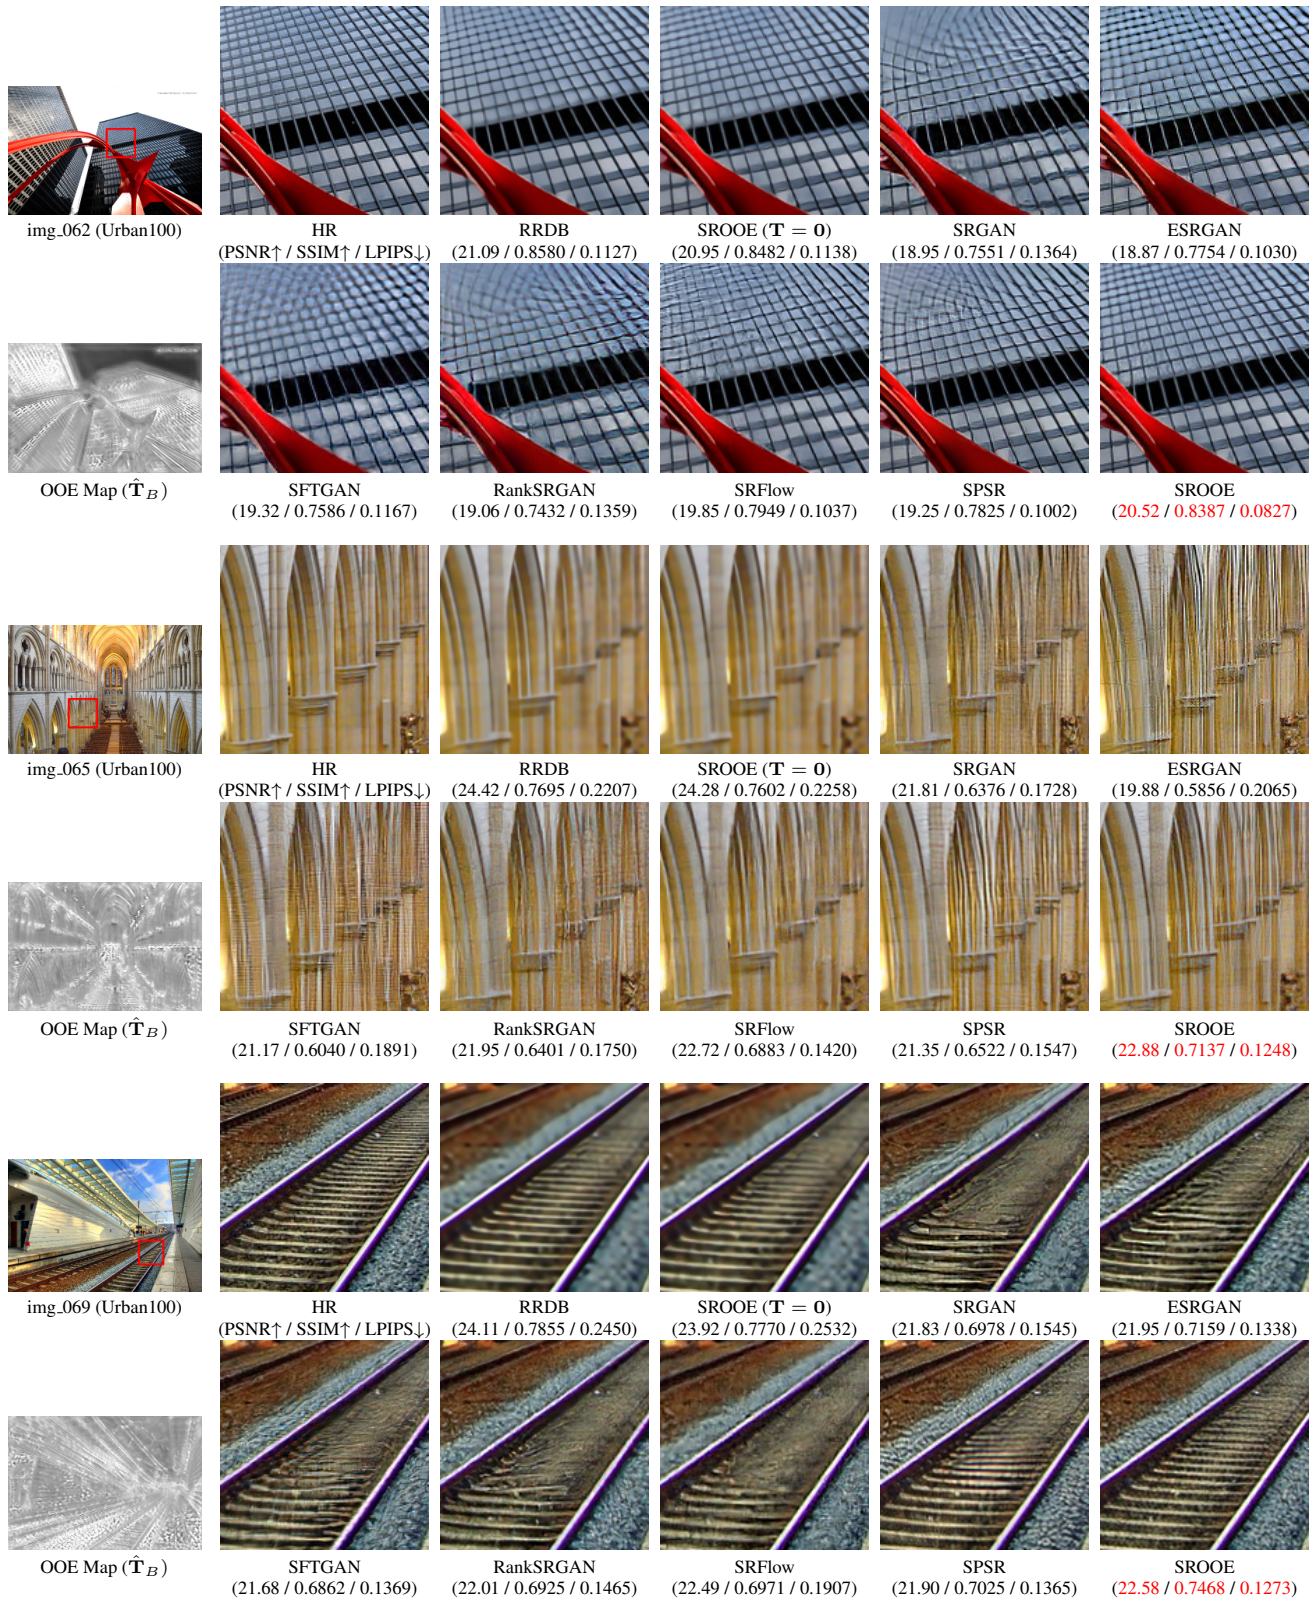

Figure 5. Visual comparison with state-of-the-art methods for  $4\times$  SR results. Among the seven perception-oriented SR methods, the best performances are highlighted in red.



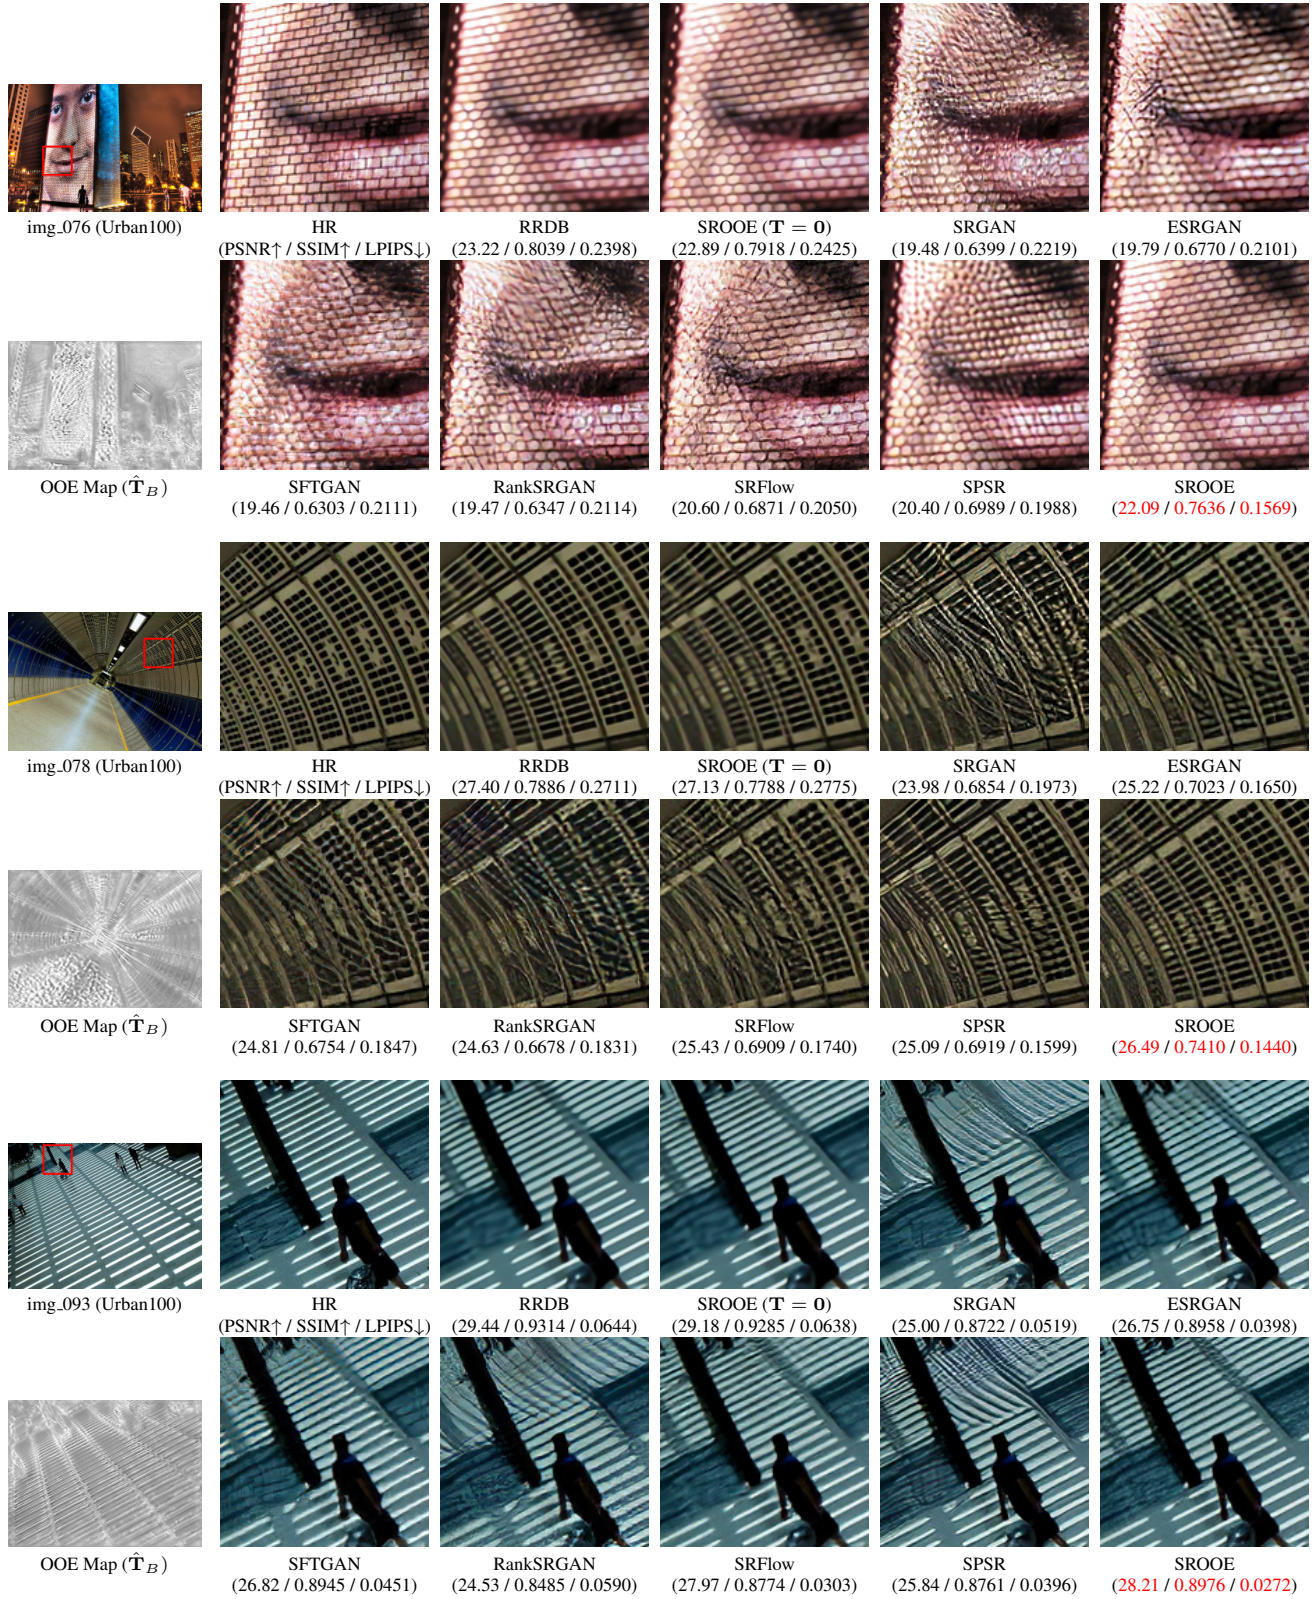

Figure 6. Visual comparison with state-of-the-art methods for  $4\times$  SR results. Among the seven perception-oriented SR methods, the best performances are highlighted in red.

Table 1. Comparison with state-of-the-art SR  $8\times$  methods on benchmarks. The 1st and the 2nd best performances for each group are highlighted in red and blue, respectively. LR-PSNR values greater than 45dB are underlined.

| Model            |                    | Distortion-oriented SR |                              |                                           |                                        | Perception-oriented SR |                                |                                    |                                |
|------------------|--------------------|------------------------|------------------------------|-------------------------------------------|----------------------------------------|------------------------|--------------------------------|------------------------------------|--------------------------------|
|                  |                    | RRDB [7]               | SRFlow<br>( $\tau = 0$ ) [3] | FxSR<br>( $\mathbf{T} = \mathbf{0}$ ) [5] | SROOE<br>( $\mathbf{T} = \mathbf{0}$ ) | ESRGAN [7]             | SRFlow<br>( $\tau = 0.9$ ) [3] | FxSR<br>( $\mathbf{T} = 0.8$ ) [5] | SROOE ( $\hat{\mathbf{T}}_B$ ) |
| Training dataset |                    | DIV2K                  | DF2K                         | DIV2K                                     | DF2K                                   | DF2K+OST               | DIV2K                          | DIV2K                              | DF2K                           |
| BSD100           | PSNR $\uparrow$    | 23.57                  | 23.37                        | <b>23.60</b>                              | <b>23.61</b>                           | 21.11                  | 21.66                          | <b>21.93</b>                       | <b>22.23</b>                   |
|                  | SSIM $\uparrow$    | 0.5708                 | 0.5428                       | <b>0.5728</b>                             | <b>0.5718</b>                          | 0.4658                 | 0.4632                         | <b>0.5039</b>                      | <b>0.5164</b>                  |
|                  | LPIPS $\downarrow$ | 0.5548                 | <b>0.5303</b>                | <b>0.5079</b>                             | 0.5378                                 | 0.3103                 | 0.3238                         | <b>0.3129</b>                      | <b>0.2996</b>                  |
|                  | DISTS $\downarrow$ | 0.2941                 | 0.3183                       | <b>0.2753</b>                             | <b>0.2861</b>                          | 0.1881                 | 0.2068                         | <b>0.1972</b>                      | <b>0.1891</b>                  |
|                  | LR-PSNR $\uparrow$ | 46.23                  | <u>52.39</u>                 | <u>47.12</u>                              | <u>45.34</u>                           | 33.81                  | <u>51.09</u>                   | 42.41                              | <u>43.57</u>                   |
| Urban100         | PSNR $\uparrow$    | 21.10                  | 20.91                        | <b>21.37</b>                              | <b>21.37</b>                           | 18.82                  | 19.41                          | <b>19.88</b>                       | <b>20.17</b>                   |
|                  | SSIM $\uparrow$    | 0.5999                 | 0.5735                       | <b>0.6122</b>                             | <b>0.6114</b>                          | 0.5005                 | 0.5013                         | <b>0.5510</b>                      | <b>0.5696</b>                  |
|                  | LPIPS $\downarrow$ | 0.4082                 | 0.3735                       | <b>0.3454</b>                             | <b>0.3720</b>                          | 0.2701                 | 0.2965                         | <b>0.2461</b>                      | <b>0.2449</b>                  |
|                  | DISTS $\downarrow$ | 0.2599                 | 0.2468                       | <b>0.2193</b>                             | <b>0.2344</b>                          | <b>0.1673</b>          | 0.2039                         | 0.1695                             | <b>0.1558</b>                  |
|                  | LR-PSNR $\uparrow$ | 42.98                  | <u>50.90</u>                 | <u>44.28</u>                              | 42.91                                  | 29.93                  | <u>48.94</u>                   | 40.62                              | <u>42.45</u>                   |
| Manga109         | PSNR $\uparrow$    | 23.05                  | 22.63                        | <b>23.23</b>                              | <b>23.26</b>                           | 20.78                  | 20.65                          | <b>21.86</b>                       | <b>22.10</b>                   |
|                  | SSIM $\uparrow$    | 0.7516                 | 0.7183                       | <b>0.7527</b>                             | <b>0.7545</b>                          | 0.6585                 | 0.6439                         | <b>0.7001</b>                      | <b>0.7094</b>                  |
|                  | LPIPS $\downarrow$ | 0.2457                 | 0.2419                       | <b>0.2097</b>                             | <b>0.2242</b>                          | 0.1823                 | 0.2188                         | <b>0.1640</b>                      | <b>0.1578</b>                  |
|                  | DISTS $\downarrow$ | 0.1495                 | 0.1627                       | <b>0.1272</b>                             | <b>0.1339</b>                          | 0.0999                 | 0.1337                         | <b>0.0980</b>                      | <b>0.0862</b>                  |
|                  | LR-PSNR $\uparrow$ | <b>43.03</b>           | <u>49.16</u>                 | 42.78                                     | 42.40                                  | 32.09                  | <u>45.56</u>                   | 40.89                              | <u>42.45</u>                   |
| DIV2K            | PSNR $\uparrow$    | 25.50                  | 25.09                        | <b>25.60</b>                              | <b>25.61</b>                           | 22.58                  | 23.04                          | <b>23.56</b>                       | <b>23.92</b>                   |
|                  | SSIM $\uparrow$    | 0.6960                 | 0.6589                       | <b>0.6989</b>                             | <b>0.6978</b>                          | 0.5891                 | 0.5728                         | <b>0.6241</b>                      | <b>0.6377</b>                  |
|                  | LPIPS $\downarrow$ | 0.4227                 | <b>0.4033</b>                | <b>0.3857</b>                             | 0.4071                                 | 0.2421                 | 0.2719                         | <b>0.2402</b>                      | <b>0.2238</b>                  |
|                  | DISTS $\downarrow$ | 0.2185                 | 0.2342                       | <b>0.1953</b>                             | <b>0.2073</b>                          | 0.1045                 | 0.1386                         | <b>0.1190</b>                      | <b>0.1075</b>                  |
|                  | LR-PSNR $\uparrow$ | 46.35                  | <u>51.28</u>                 | <u>46.96</u>                              | <u>45.68</u>                           | 33.15                  | <u>50.26</u>                   | 42.66                              | <u>44.08</u>                   |

Table 2. Performance comparison of SR results of ESRGAN models with different weight vectors for perceptual loss. Among the objectives in Sets  $A$  and  $B$ , except for  $\lambda_0$ , the 1st and the 2nd best performances for each column are highlighted in red and blue.

| Set | objec-<br>tive  | $\lambda_{per}$           |                 |                 |                 |                 | $L_{per1}$    |              |               |           |           | Metric |       |
|-----|-----------------|---------------------------|-----------------|-----------------|-----------------|-----------------|---------------|--------------|---------------|-----------|-----------|--------|-------|
|     |                 | $\lambda_{V12}$           | $\lambda_{V22}$ | $\lambda_{V34}$ | $\lambda_{V44}$ | $\lambda_{V54}$ | $L_{V12}$     | $L_{V22}$    | $L_{V34}$     | $L_{V44}$ | $L_{V54}$ | PSNR   | LPIPS |
|     | $\lambda_0$     | [0.0, 0.0, 0.0, 0.0, 0.0] | 0.6459          | 1.8793          | 3.9235          | 2.2091          | 1.2767        | 25.48        | 0.1960        |           |           |        |       |
| $A$ | $\lambda_1$     | [1.0, 0.0, 0.0, 0.0, 0.0] | <b>0.8320</b>   | 2.0275          | 3.8340          | 1.9804          | 1.0480        | <b>23.95</b> | 0.1124        |           |           |        |       |
|     | $\lambda_2$     | [0.0, 1.0, 0.0, 0.0, 0.0] | 0.8322          | <b>1.9523</b>   | 3.6789          | 1.9200          | 1.0171        | 23.84        | 0.1125        |           |           |        |       |
|     | $\lambda_3$     | [0.0, 0.0, 1.0, 0.0, 0.0] | 0.8565          | 2.0222          | <b>3.5480</b>   | <b>1.8452</b>   | 0.9841        | 23.66        | 0.1124        |           |           |        |       |
|     | $\lambda_4$     | [0.0, 0.0, 0.0, 1.0, 0.0] | 0.8844          | 2.0977          | 3.7413          | 1.8777          | 0.9890        | 23.28        | 0.1158        |           |           |        |       |
|     | $\lambda_5$     | [0.0, 0.0, 0.0, 0.0, 1.0] | 0.9051          | 2.1593          | 3.8985          | 1.9565          | 1.0085        | 23.00        | 0.1232        |           |           |        |       |
| $B$ | $\lambda_1$     | [1.0, 0.0, 0.0, 0.0, 0.0] | <b>0.8320</b>   | 2.0275          | 3.8340          | 1.9804          | 1.0480        | <b>23.95</b> | 0.1124        |           |           |        |       |
|     | $\lambda_{1-2}$ | [1/2, 1/2, 0.0, 0.0, 0.0] | <b>0.8112</b>   | <b>1.9432</b>   | 3.6740          | 1.9114          | 1.0125        | <b>24.08</b> | <b>0.1075</b> |           |           |        |       |
|     | $\lambda_{1-3}$ | [1/3, 1/3, 1/3, 0.0, 0.0] | 0.8468          | 1.9964          | <b>3.5846</b>   | 1.8532          | <b>0.9821</b> | 23.81        | 0.1112        |           |           |        |       |
|     | $\lambda_{1-4}$ | [1/4, 1/4, 1/4, 1/4, 0.0] | 0.8474          | 2.0085          | 3.6174          | <b>1.8489</b>   | <b>0.9765</b> | 23.68        | <b>0.1110</b> |           |           |        |       |
|     | $\lambda_{1-5}$ | [1/5, 1/5, 1/5, 1/5, 1/5] | 0.8439          | 2.0085          | 3.6174          | 1.8515          | 0.9821        | 23.74        | 0.1114        |           |           |        |       |



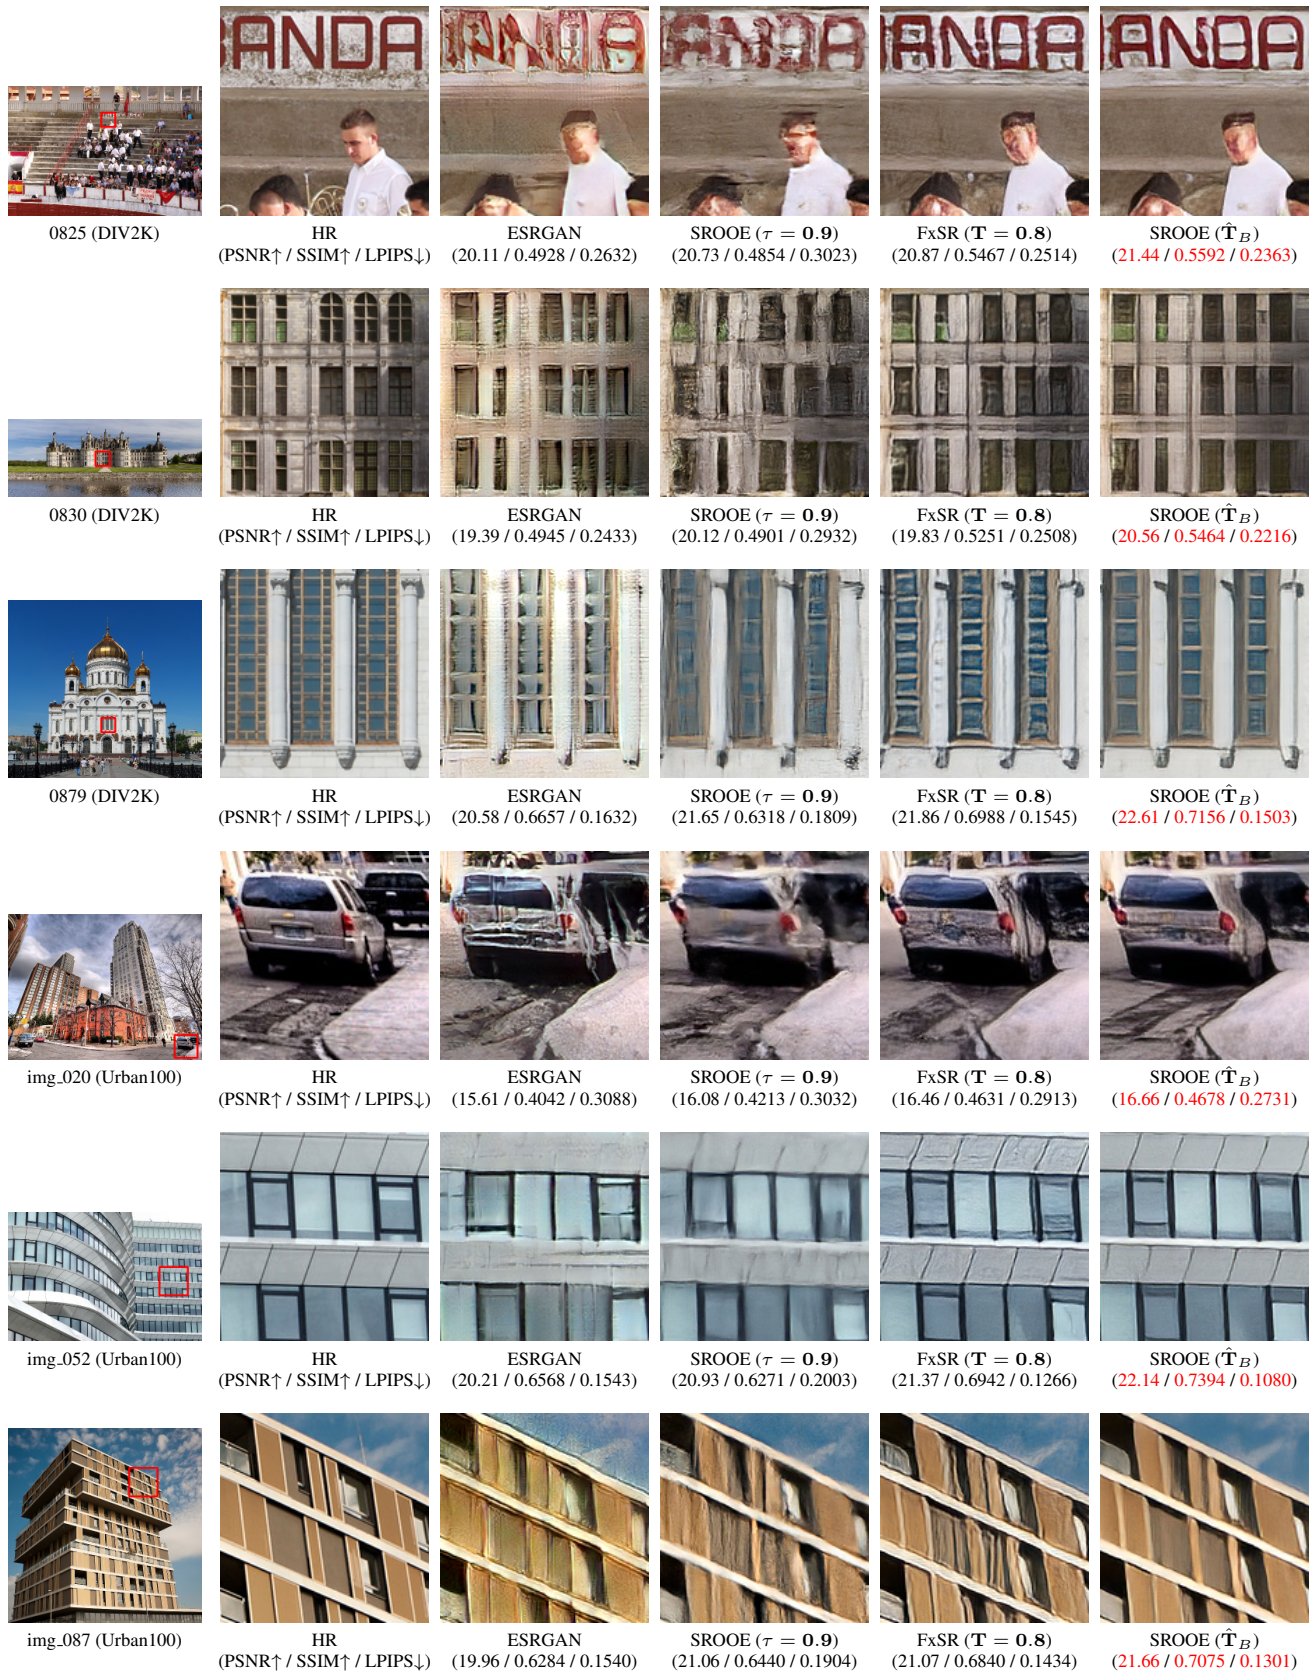

Figure 7. Visual comparison with state-of-the-art methods for  $8\times$  SR results. Among the four perception-oriented SR methods, the best performances are highlighted in red.



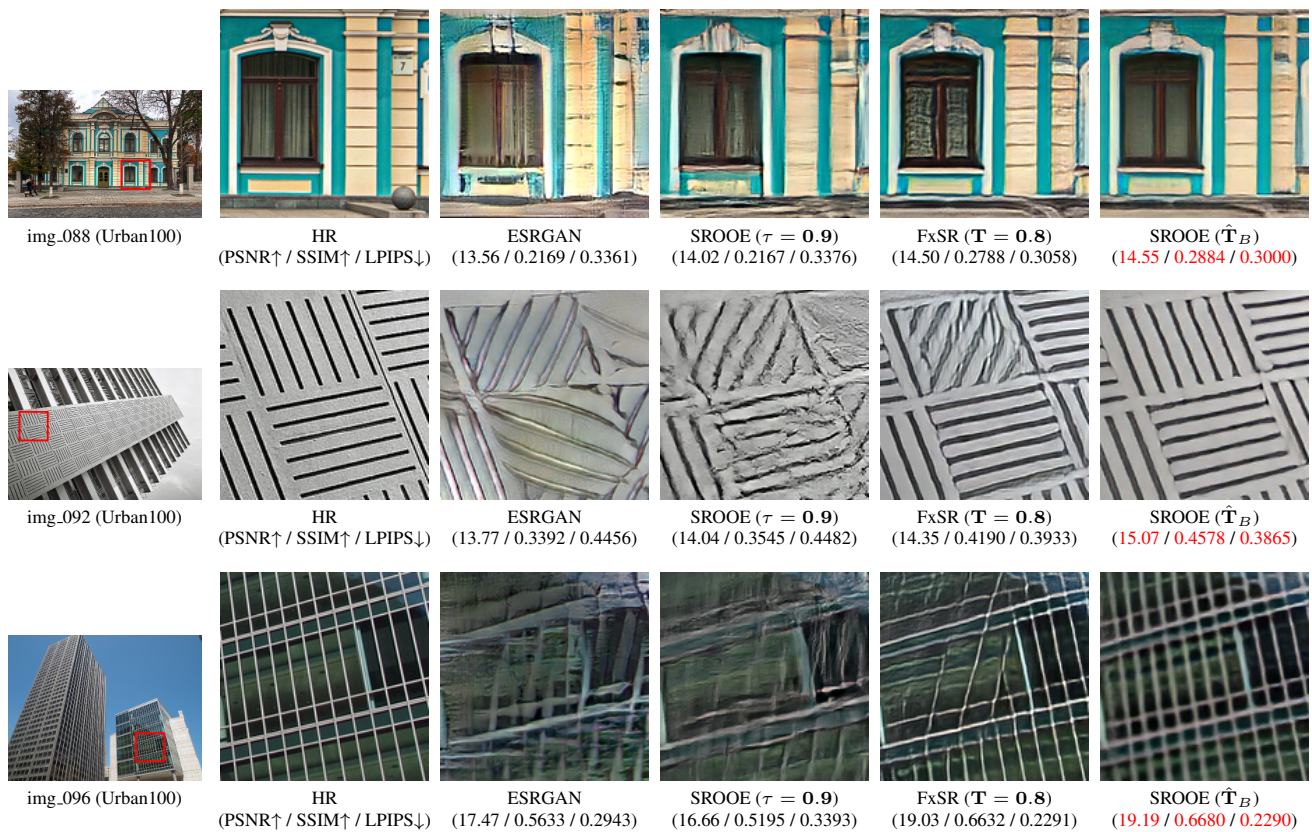

Figure 8. Visual comparison with state-of-the-art methods for  $8\times$  SR results. Among the four perception-oriented SR methods, the best performances are highlighted in red.
